# Supplementary material for: Predicting the Potential Distribution of Perennial Plant Coptis chinensis Franch. in China under Multiple Climate Change Scenarios
Source: MDPI journal article supplement (doi:10.3390/f12111464), 2021-10-27
Supplement: s1 [file s1]

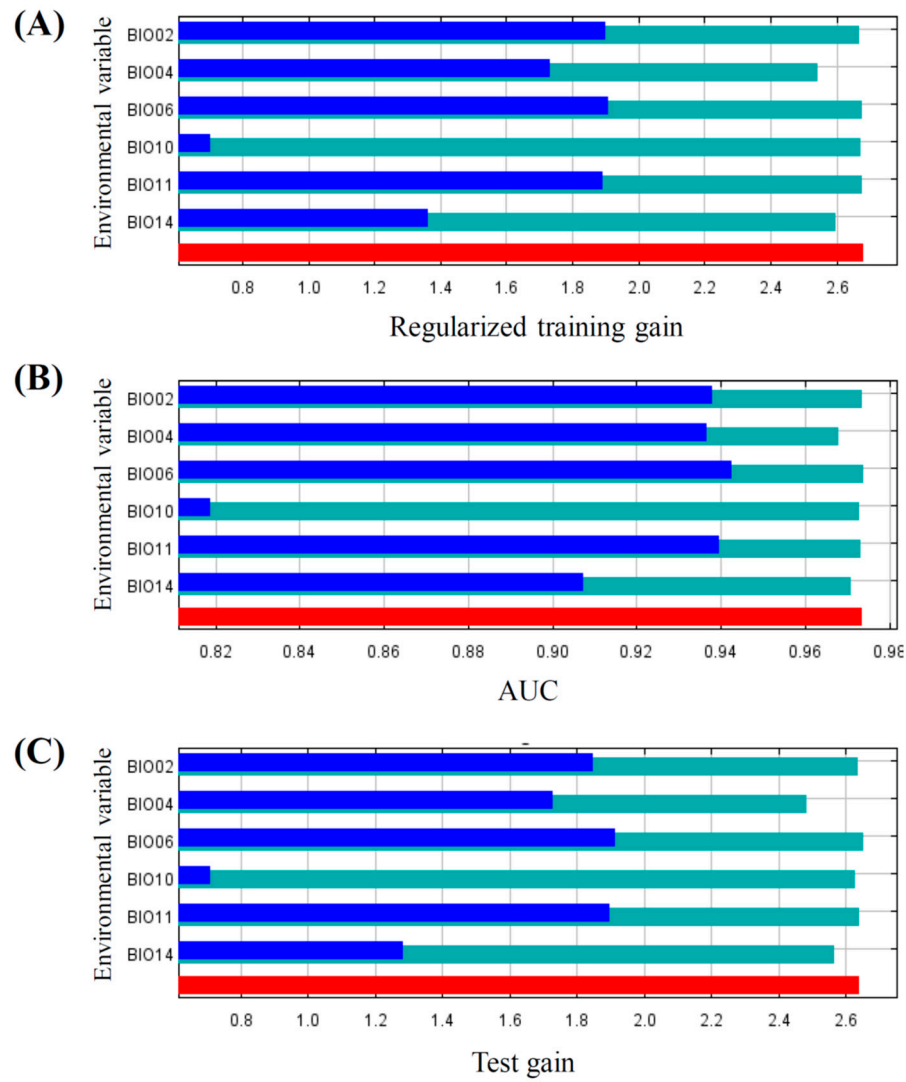

**Figure S1.** Jackknife test of the importance of variables. Blue, green, and red bars represent running the MaxEnt model with the variable alone, without the variable, and with all variables, respectively. (A): regularization training gain; (B): test gain; (C): AUC.

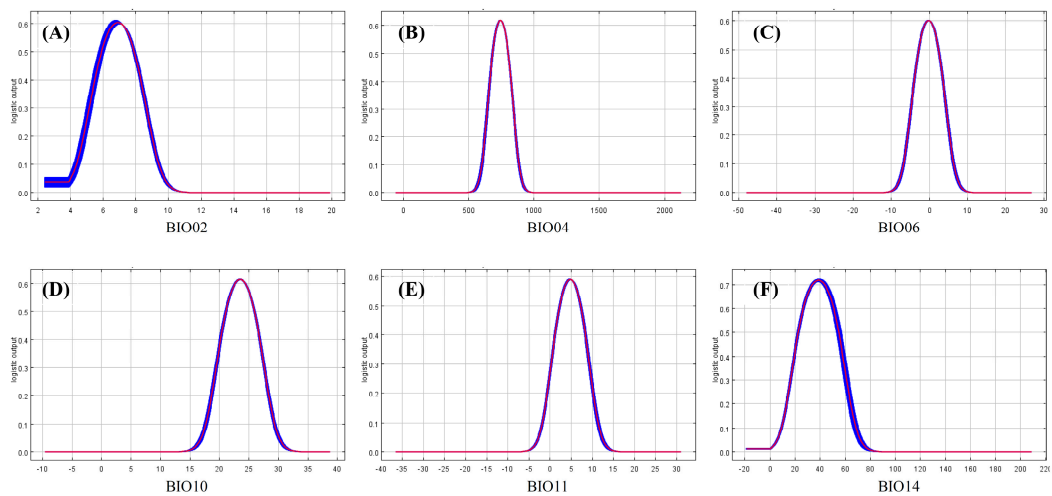

**Figure S2.** Response curves of six environmental predictors used in the ecological niche model for *Coptis chinensis*.

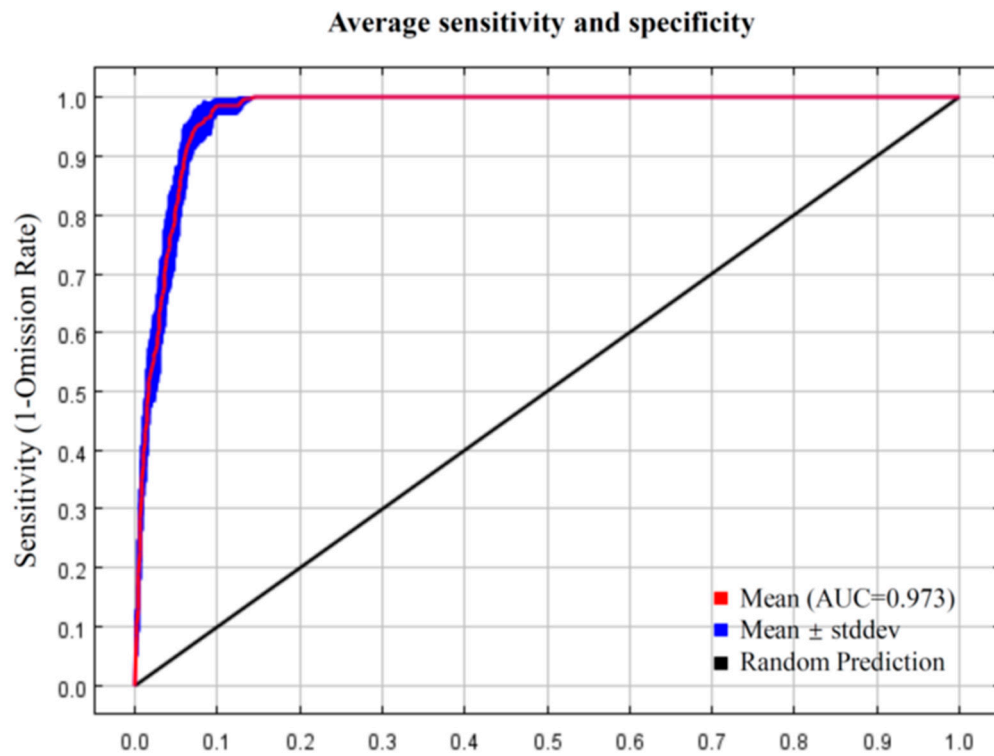

**Figure S3.** Prediction validation with receiver operator characteristic (ROC) curves using the MaxEnt model. AUC: the area under curve.

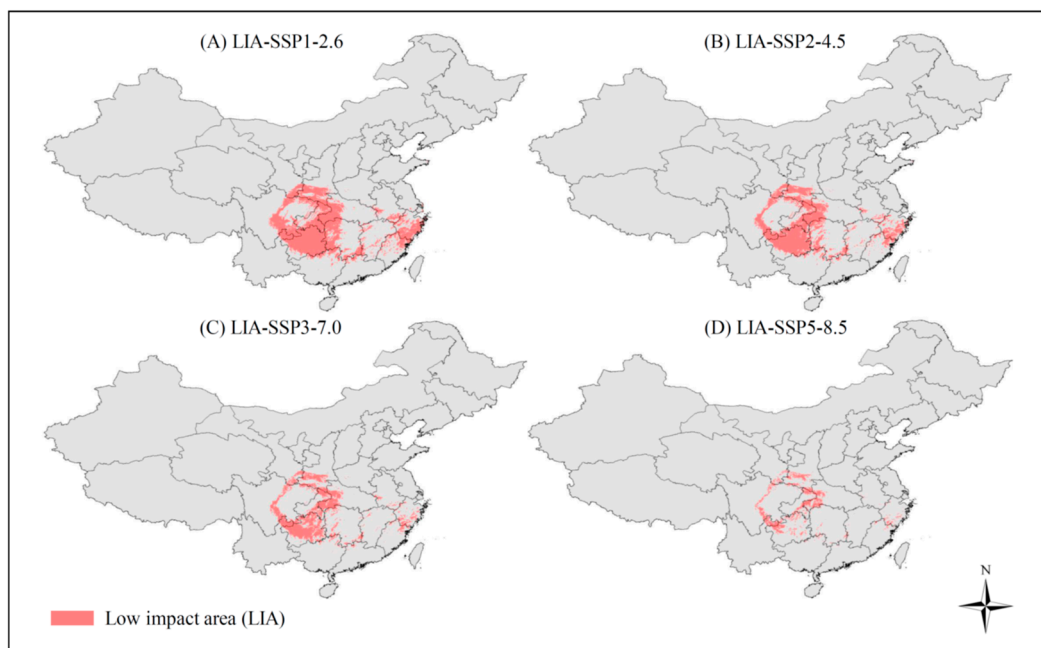

**Figure S4.** Low impact area of *Coptis chinensis* under four shared socio-economic pathways (SSP1-2.6, SSP2-4.5, SSP3-7.0 and SSP5-8.5).

**Table S1.** The rarefying data points (136) of *Coptis chinensis* in China.

| Species                 | Lon*     | Lat*    | Species                 | Lon*     | Lat*    | Species                 | Lon*     | Lat*    |
|-------------------------|----------|---------|-------------------------|----------|---------|-------------------------|----------|---------|
| <i>Coptis chinensis</i> | 102.7292 | 30.0208 | <i>Coptis chinensis</i> | 107.9792 | 26.6042 | <i>Coptis chinensis</i> | 110.5625 | 26.4375 |
| <i>Coptis chinensis</i> | 102.8125 | 30.3958 | <i>Coptis chinensis</i> | 107.9792 | 29.6458 | <i>Coptis chinensis</i> | 110.7292 | 31.7292 |
| <i>Coptis chinensis</i> | 102.9375 | 29.6458 | <i>Coptis chinensis</i> | 108.1458 | 29.6458 | <i>Coptis chinensis</i> | 111.4375 | 25.8542 |
| <i>Coptis chinensis</i> | 102.9792 | 29.7708 | <i>Coptis chinensis</i> | 108.2292 | 26.3958 | <i>Coptis chinensis</i> | 111.6458 | 28.1458 |
| <i>Coptis chinensis</i> | 103.0208 | 29.7708 | <i>Coptis chinensis</i> | 108.2708 | 24.8125 | <i>Coptis chinensis</i> | 111.9375 | 26.0625 |
| <i>Coptis chinensis</i> | 103.1042 | 29.6458 | <i>Coptis chinensis</i> | 108.2708 | 26.3542 | <i>Coptis chinensis</i> | 112.0208 | 25.2708 |
| <i>Coptis chinensis</i> | 103.1042 | 29.7708 | <i>Coptis chinensis</i> | 108.2708 | 32.6875 | <i>Coptis chinensis</i> | 112.9375 | 24.9375 |
| <i>Coptis chinensis</i> | 103.1458 | 29.7292 | <i>Coptis chinensis</i> | 108.3125 | 28.8125 | <i>Coptis chinensis</i> | 112.9792 | 24.9792 |
| <i>Coptis chinensis</i> | 103.1875 | 30.0208 | <i>Coptis chinensis</i> | 108.3958 | 30.2292 | <i>Coptis chinensis</i> | 113.0208 | 24.9375 |
| <i>Coptis chinensis</i> | 103.2292 | 30.4792 | <i>Coptis chinensis</i> | 108.4375 | 27.0625 | <i>Coptis chinensis</i> | 113.7292 | 25.3125 |
| <i>Coptis chinensis</i> | 103.3125 | 30.4792 | <i>Coptis chinensis</i> | 108.6042 | 28.8958 | <i>Coptis chinensis</i> | 114.0208 | 27.3958 |
| <i>Coptis chinensis</i> | 103.3542 | 29.5625 | <i>Coptis chinensis</i> | 108.6458 | 27.8958 | <i>Coptis chinensis</i> | 114.0625 | 26.2708 |
| <i>Coptis chinensis</i> | 103.3958 | 29.5625 | <i>Coptis chinensis</i> | 108.6458 | 31.4792 | <i>Coptis chinensis</i> | 114.1042 | 26.5625 |
| <i>Coptis chinensis</i> | 105.4792 | 28.2708 | <i>Coptis chinensis</i> | 108.6875 | 27.9375 | <i>Coptis chinensis</i> | 114.1875 | 26.5625 |
| <i>Coptis chinensis</i> | 105.5208 | 32.2292 | <i>Coptis chinensis</i> | 108.7292 | 25.2292 | <i>Coptis chinensis</i> | 114.1875 | 27.4375 |
| <i>Coptis chinensis</i> | 105.5625 | 28.3125 | <i>Coptis chinensis</i> | 108.7292 | 29.2292 | <i>Coptis chinensis</i> | 114.2292 | 26.2708 |
| <i>Coptis chinensis</i> | 105.7292 | 27.1875 | <i>Coptis chinensis</i> | 108.7292 | 32.2708 | <i>Coptis chinensis</i> | 114.3125 | 26.7708 |
| <i>Coptis chinensis</i> | 105.8125 | 27.9375 | <i>Coptis chinensis</i> | 108.7708 | 31.6458 | <i>Coptis chinensis</i> | 114.3125 | 27.6042 |
| <i>Coptis chinensis</i> | 105.8542 | 28.8125 | <i>Coptis chinensis</i> | 108.8542 | 25.2708 | <i>Coptis chinensis</i> | 114.4375 | 26.3542 |
| <i>Coptis chinensis</i> | 106.0208 | 29.2708 | <i>Coptis chinensis</i> | 108.8958 | 32.3125 | <i>Coptis chinensis</i> | 114.5625 | 29.0208 |
| <i>Coptis chinensis</i> | 106.1042 | 25.7292 | <i>Coptis chinensis</i> | 109.0208 | 28.4375 | <i>Coptis chinensis</i> | 115.8125 | 25.0208 |
| <i>Coptis chinensis</i> | 106.1458 | 28.4792 | <i>Coptis chinensis</i> | 109.0208 | 29.1458 | <i>Coptis chinensis</i> | 115.9375 | 29.5625 |
| <i>Coptis chinensis</i> | 106.1458 | 30.0208 | <i>Coptis chinensis</i> | 109.0208 | 32.2292 | <i>Coptis chinensis</i> | 116.4792 | 26.6042 |
| <i>Coptis chinensis</i> | 106.1458 | 31.0208 | <i>Coptis chinensis</i> | 109.1042 | 30.1458 | <i>Coptis chinensis</i> | 116.7292 | 26.9375 |
| <i>Coptis chinensis</i> | 106.1458 | 32.0208 | <i>Coptis chinensis</i> | 109.1458 | 29.0625 | <i>Coptis chinensis</i> | 116.8958 | 27.2708 |
| <i>Coptis chinensis</i> | 106.1458 | 33.0208 | <i>Coptis chinensis</i> | 109.2708 | 25.0625 | <i>Coptis chinensis</i> | 117.5625 | 25.9375 |
| <i>Coptis chinensis</i> | 106.1875 | 28.3958 | <i>Coptis chinensis</i> | 109.3958 | 30.9375 | <i>Coptis chinensis</i> | 117.6458 | 27.5625 |
| <i>Coptis chinensis</i> | 106.3958 | 28.6042 | <i>Coptis chinensis</i> | 109.5625 | 31.3958 | <i>Coptis chinensis</i> | 117.8125 | 28.0208 |
| <i>Coptis chinensis</i> | 106.4792 | 32.8125 | <i>Coptis chinensis</i> | 109.5625 | 32.1042 | <i>Coptis chinensis</i> | 117.8125 | 30.4792 |
| <i>Coptis chinensis</i> | 106.7708 | 25.6875 | <i>Coptis chinensis</i> | 109.6875 | 29.5625 | <i>Coptis chinensis</i> | 118.0625 | 28.8958 |
| <i>Coptis chinensis</i> | 106.7708 | 27.9792 | <i>Coptis chinensis</i> | 109.7708 | 27.2708 | <i>Coptis chinensis</i> | 118.0625 | 29.5625 |
| <i>Coptis chinensis</i> | 106.8125 | 29.2708 | <i>Coptis chinensis</i> | 109.8125 | 29.6875 | <i>Coptis chinensis</i> | 118.1458 | 29.1875 |
| <i>Coptis chinensis</i> | 106.8542 | 26.0208 | <i>Coptis chinensis</i> | 109.8125 | 32.0625 | <i>Coptis chinensis</i> | 118.1458 | 30.0625 |
| <i>Coptis chinensis</i> | 107.0208 | 26.5625 | <i>Coptis chinensis</i> | 109.9375 | 25.5208 | <i>Coptis chinensis</i> | 118.1458 | 30.1875 |
| <i>Coptis chinensis</i> | 107.1042 | 29.1458 | <i>Coptis chinensis</i> | 110.0208 | 25.8125 | <i>Coptis chinensis</i> | 118.1458 | 30.2292 |
| <i>Coptis chinensis</i> | 107.1458 | 28.3125 | <i>Coptis chinensis</i> | 110.0208 | 26.3542 | <i>Coptis chinensis</i> | 118.1875 | 30.1458 |
| <i>Coptis chinensis</i> | 107.1458 | 29.0625 | <i>Coptis chinensis</i> | 110.0208 | 26.3958 | <i>Coptis chinensis</i> | 119.0625 | 26.3125 |
| <i>Coptis chinensis</i> | 107.3958 | 26.8542 | <i>Coptis chinensis</i> | 110.0208 | 29.6875 | <i>Coptis chinensis</i> | 119.1042 | 28.4375 |
| <i>Coptis chinensis</i> | 107.3958 | 28.1875 | <i>Coptis chinensis</i> | 110.0625 | 28.6875 | <i>Coptis chinensis</i> | 119.1042 | 29.4375 |
| <i>Coptis chinensis</i> | 107.3958 | 34.0625 | <i>Coptis chinensis</i> | 110.0625 | 31.2708 | <i>Coptis chinensis</i> | 119.3125 | 25.8542 |
| <i>Coptis chinensis</i> | 107.4375 | 29.1458 | <i>Coptis chinensis</i> | 110.1042 | 28.9375 | <i>Coptis chinensis</i> | 119.6875 | 27.7292 |
| <i>Coptis chinensis</i> | 107.4375 | 29.2292 | <i>Coptis chinensis</i> | 110.3125 | 31.3958 | <i>Coptis chinensis</i> | 120.1042 | 30.2708 |
| <i>Coptis chinensis</i> | 107.6042 | 29.1042 | <i>Coptis chinensis</i> | 110.4375 | 25.8542 | <i>Coptis chinensis</i> | 120.4792 | 27.6875 |
| <i>Coptis chinensis</i> | 107.6875 | 29.6042 | <i>Coptis chinensis</i> | 110.4375 | 29.3125 | <i>Coptis chinensis</i> | 121.0208 | 29.2708 |
| <i>Coptis chinensis</i> | 107.6875 | 29.6458 | <i>Coptis chinensis</i> | 110.5208 | 29.6458 | <i>Coptis chinensis</i> | 98.8542  | 26.9375 |
| <i>Coptis chinensis</i> | 107.7292 | 29.5208 |                         |          |         |                         |          |         |

\* Lon = Longitude (° E), Lat = Latitude (° N).
